# Supplementary material for: Description of male Tylorida sataraensis Kulkarni, 2014 (Araneae, Tetragnathidae) with notes on habits and conservation status
Source: Biodivers Data J. 2015 Feb 16;(3):e4451. doi: 10.3897/BDJ.3.e4451 (PMC4339815; doi:10.3897/BDJ.3.e4451)
Supplement: Supplementary material 1 — Submersion time of T. sataraensis under water (N=20) [file biodiversity_data_journal-3-e4451-s001.xlsx]

## Sheet: Sheet1
Spider number	Time (in secs)
1	201
2	19
3	189
4	428
5	230
6	0
7	214
8	627
9	341
10	357
11	378
12	632
13	35
14	829
15	0
16	257
17	478
18	357
19	423
20	9
